# Supplementary material for: National and Subnational Incidence, Mortality, and Years of Life Lost Due to Breast Cancer in Iran: Trends and Age-Period-Cohort Analysis Since 1990
Source: PubMed Central journal article supplement (PMC8027299; doi:10.3389/fonc.2021.561376), 2021-03-25
Supplement: Image_1.pdf [file Image_1.pdf]

1990

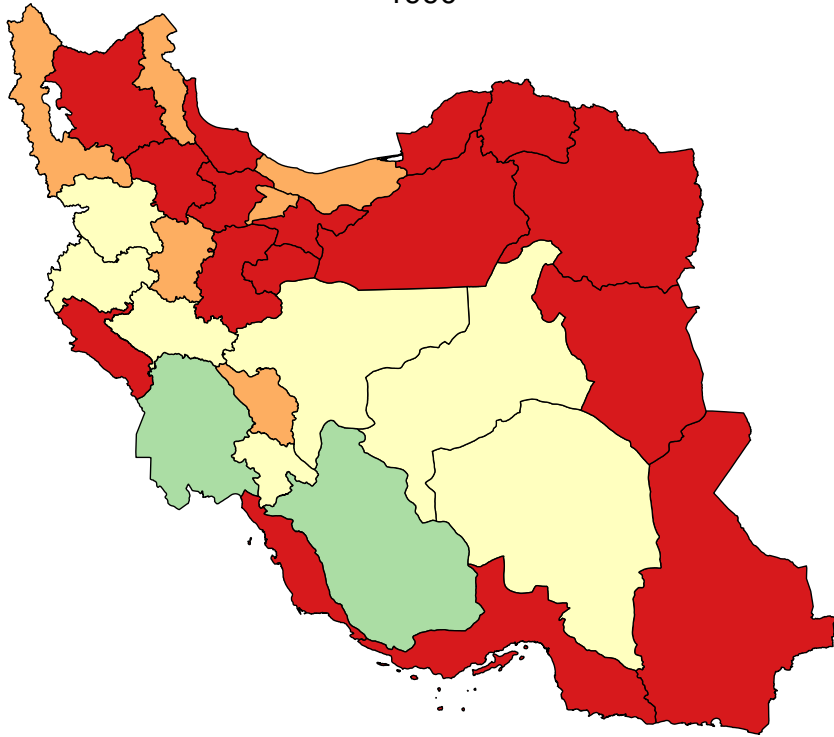

1995

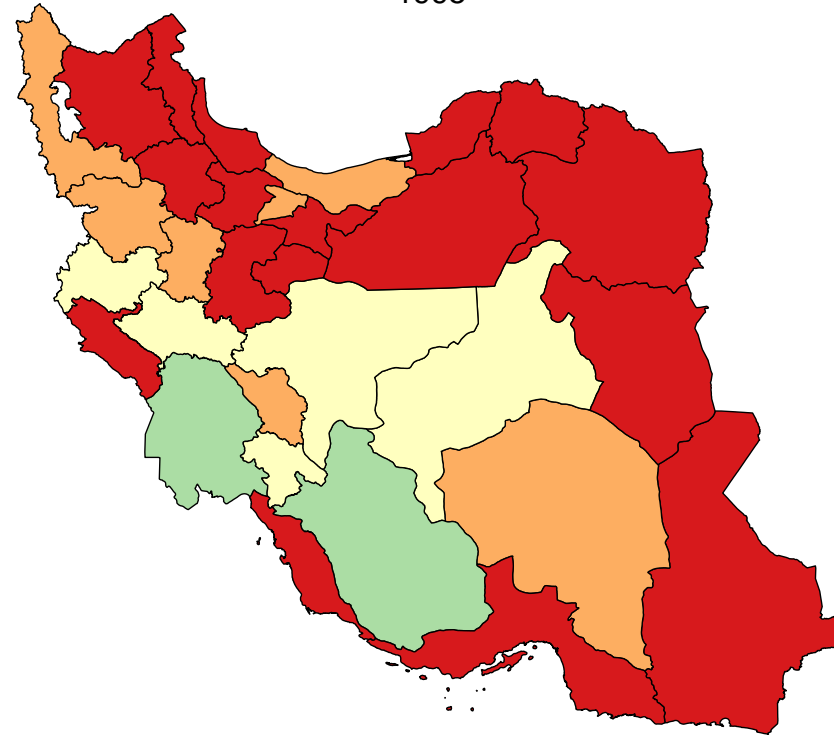

2000

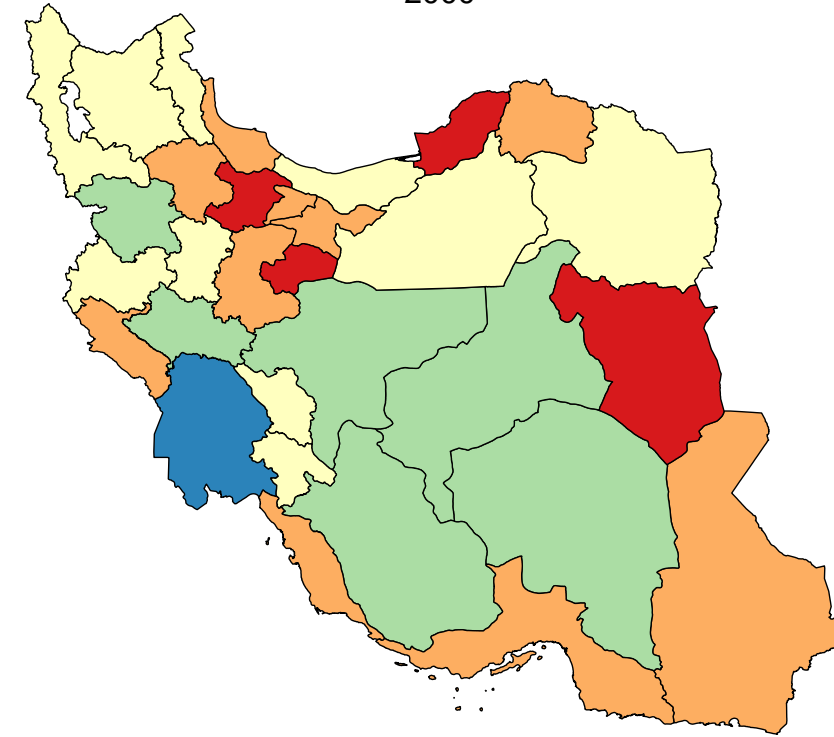

2005

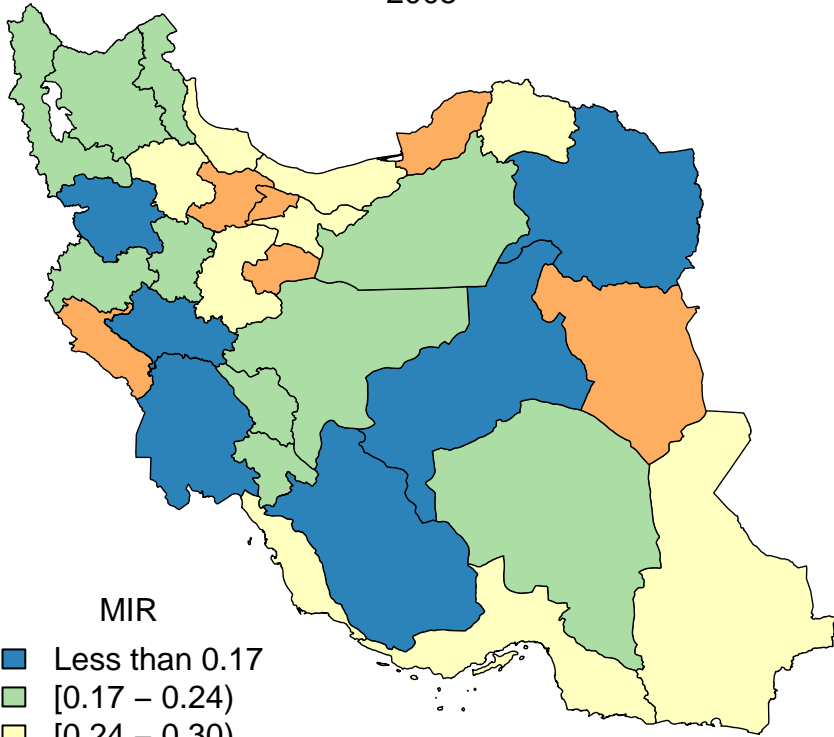

2010

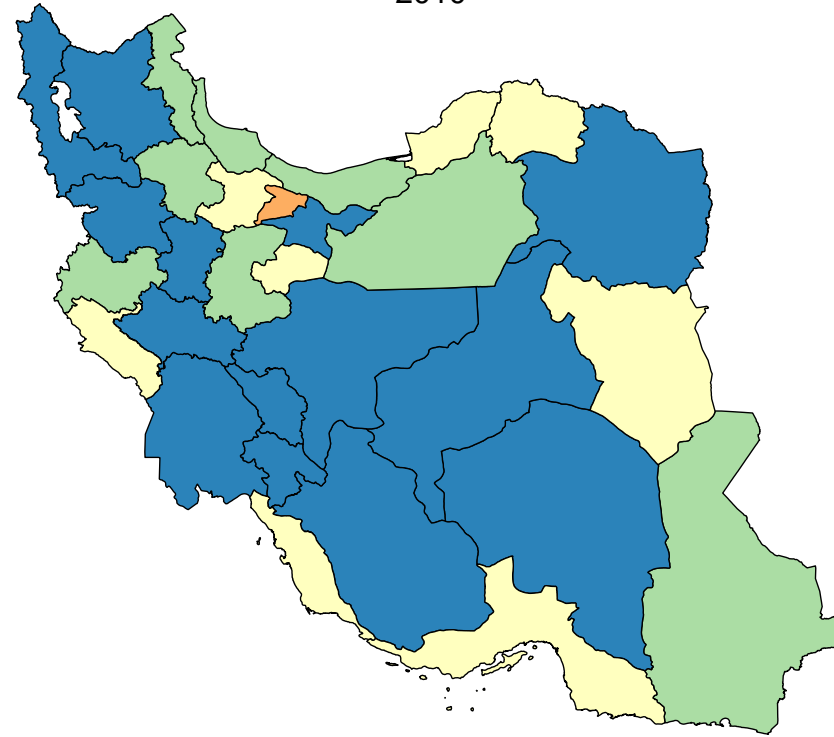

2015

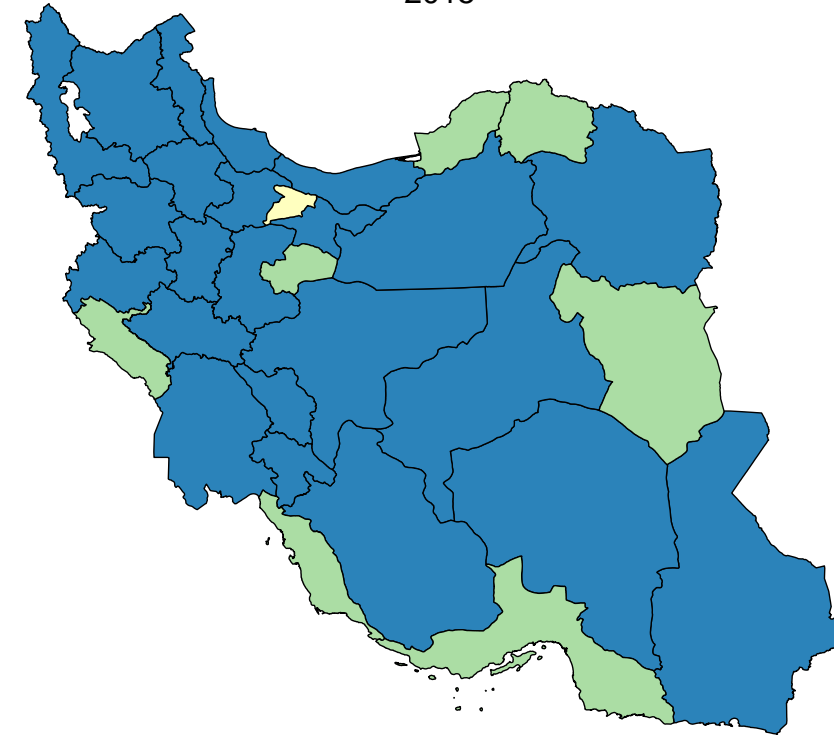

MIR

- Less than 0.17
- [0.17 – 0.24)
- [0.24 – 0.30)
- [0.30 – 0.42)
- More than 0.42
