# Supplementary material for: National and Subnational Incidence, Mortality, and Years of Life Lost Due to Breast Cancer in Iran: Trends and Age-Period-Cohort Analysis Since 1990
Source: PubMed Central journal article supplement (PMC8027299; doi:10.3389/fonc.2021.561376), 2021-03-25

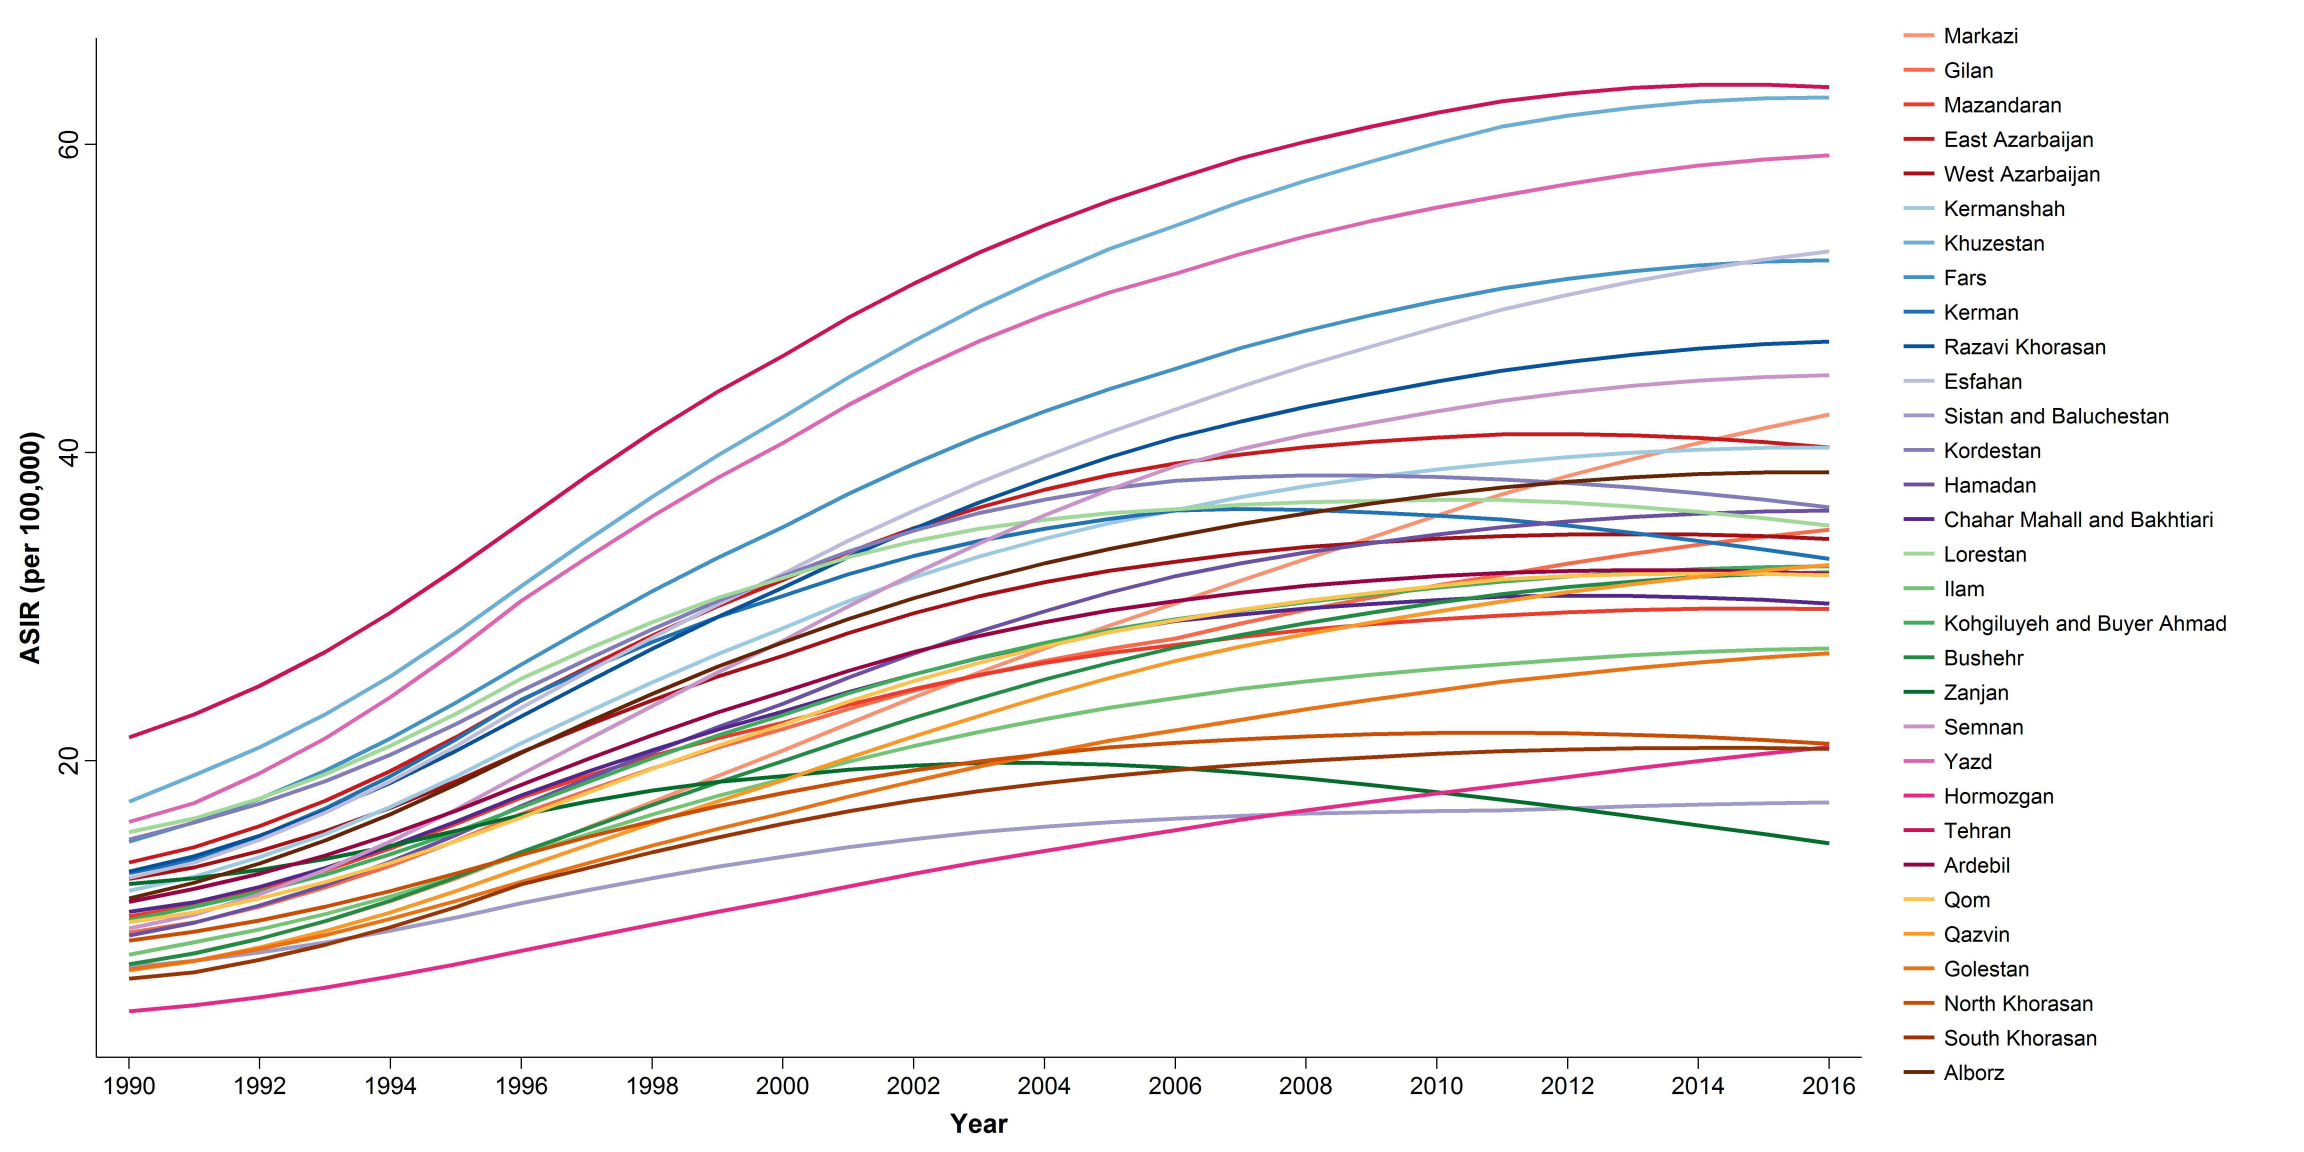

Supplement: Image_2.pdf [file Image_2.pdf]
