# Supplementary material for: National and Subnational Incidence, Mortality, and Years of Life Lost Due to Breast Cancer in Iran: Trends and Age-Period-Cohort Analysis Since 1990
Source: PubMed Central journal article supplement (PMC8027299; doi:10.3389/fonc.2021.561376), 2021-03-25
Supplement: Table_1.pdf [file Table_1.pdf]

**Table S1. Incidence decomposition (%) at national and sub-national levels**

| Location     | New cases                   |       | % 1990 - 2016 incident case change cause |                             |                              | Overall change |         |
|--------------|-----------------------------|-------|------------------------------------------|-----------------------------|------------------------------|----------------|---------|
|              | 1990                        | 2016  | Due to population growth                 | Due to age structure change | Due to incidence rate change |                |         |
| National     | 1452                        | 14217 | 122.4%                                   | 67.5%                       | 689.2%                       | 879.0%         |         |
| Sub-national | Alborz                      | 24    | 401                                      | 279.6%                      | 126.2%                       | 1196.5%        | 1602.2% |
|              | Ardebil                     | 23    | 164                                      | 80.8%                       | 57.2%                        | 468.7%         | 606.6%  |
|              | Bushehr                     | 9     | 119                                      | 144.5%                      | 49.2%                        | 1063.1%        | 1256.7% |
|              | Chahar Mahall and Bakhtiari | 13    | 106                                      | 105.7%                      | 69.6%                        | 523.9%         | 699.2%  |
|              | East Azarbaijan             | 92    | 682                                      | 75.2%                       | 69.4%                        | 496.0%         | 640.6%  |
|              | Esfahan                     | 98    | 1213                                     | 117.9%                      | 68.1%                        | 949.4%         | 1135.5% |
|              | Fars                        | 101   | 1042                                     | 124.9%                      | 65.9%                        | 737.4%         | 928.1%  |
|              | Gilan                       | 48    | 465                                      | 71.9%                       | 68.9%                        | 735.5%         | 876.3%  |
|              | Golestan                    | 15    | 184                                      | 129.0%                      | 59.7%                        | 902.9%         | 1091.6% |
|              | Hamadan                     | 28    | 289                                      | 78.4%                       | 62.9%                        | 772.6%         | 913.9%  |
|              | Hormozgan                   | 7     | 116                                      | 205.9%                      | 26.6%                        | 1447.6%        | 1680.1% |
|              | Ilam                        | 6     | 58                                       | 137.5%                      | 53.0%                        | 759.9%         | 950.4%  |
|              | Kerman                      | 45    | 385                                      | 177.3%                      | 57.5%                        | 518.8%         | 753.6%  |
|              | Kermanshah                  | 34    | 341                                      | 103.9%                      | 80.1%                        | 714.5%         | 898.5%  |
|              | Khuzestan                   | 97    | 1003                                     | 154.2%                      | 36.3%                        | 743.1%         | 933.6%  |
|              | Kohgiluyeh and Buyer Ahmad  | 8     | 79                                       | 150.9%                      | 48.9%                        | 685.8%         | 885.7%  |
|              | Kordestan                   | 35    | 220                                      | 108.7%                      | 50.6%                        | 369.9%         | 529.2%  |
|              | Lorestan                    | 40    | 251                                      | 104.7%                      | 70.0%                        | 350.4%         | 525.1%  |
|              | Markazi                     | 18    | 281                                      | 90.3%                       | 62.7%                        | 1334.6%        | 1487.5% |
|              | Mazandaran                  | 54    | 453                                      | 93.9%                       | 75.3%                        | 563.7%         | 732.9%  |
|              | North Khorasan              | 11    | 73                                       | 108.8%                      | 63.2%                        | 407.8%         | 579.8%  |
|              | Qazvin                      | 11    | 166                                      | 120.2%                      | 66.4%                        | 1158.4%        | 1345.0% |
|              | Qom                         | 14    | 137                                      | 156.0%                      | 50.2%                        | 702.7%         | 908.9%  |
|              | Razavi Khorasan             | 115   | 1164                                     | 114.1%                      | 64.3%                        | 734.3%         | 912.7%  |
|              | Semnan                      | 10    | 130                                      | 113.4%                      | 41.8%                        | 1027.3%        | 1182.5% |
|              | Sistan and Baluchestan      | 16    | 121                                      | 181.4%                      | 32.1%                        | 454.4%         | 667.9%  |
|              | South Khorasan              | 8     | 57                                       | 55.8%                       | 50.5%                        | 511.7%         | 617.9%  |
|              | Tehran                      | 371   | 3709                                     | 138.0%                      | 97.9%                        | 663.3%         | 899.2%  |
|              | West Azarbaijan             | 54    | 442                                      | 120.4%                      | 74.9%                        | 530.5%         | 725.8%  |
|              | Yazd                        | 27    | 301                                      | 135.7%                      | 67.3%                        | 829.0%         | 1031.9% |
| Zanjan       | 21                          | 62    | 99.1%                                    | 51.7%                       | 53.5%                        | 204.3%         |         |
