# Supplementary material for: National and Subnational Incidence, Mortality, and Years of Life Lost Due to Breast Cancer in Iran: Trends and Age-Period-Cohort Analysis Since 1990
Source: PubMed Central journal article supplement (PMC8027299; doi:10.3389/fonc.2021.561376), 2021-03-25
Supplement: Table_2.pdf [file Table_2.pdf]

**Table S2. Effect of age, period and cohort on incidence and mortality**

| Effect   | Factor    | Incidence        |                  |         | Mortality        |                  |         |
|----------|-----------|------------------|------------------|---------|------------------|------------------|---------|
|          |           | Coefficient      | 95% CI           | P-Value | Coefficient      | 95% CI           | P-Value |
| Age      | 15-19     | -1.59            | (-1.63 to -1.54) | <0.001  | -2.73            | (-2.95 to -2.52) | <0.001  |
|          | 20-24     | -1.33            | (-1.36 to -1.29) | <0.001  | -2.35            | (-2.51 to -2.18) | <0.001  |
|          | 25-29     | -1.18            | (-1.21 to -1.15) | <0.001  | -1.73            | (-1.86 to -1.59) | <0.001  |
|          | 30-34     | -0.83            | (-0.86 to -0.80) | <0.001  | -0.97            | (-1.08 to -0.86) | <0.001  |
|          | 35-39     | -0.54            | (-0.56 to -0.51) | <0.001  | -0.41            | (-0.51 to -0.31) | <0.001  |
|          | 40-44     | -0.29            | (-0.31 to -0.26) | <0.001  | 0.08             | (-0.01 to 0.17)  | 0.090   |
|          | 45-49     | -0.05            | (-0.07 to -0.03) | <0.001  | 0.48             | (0.40 to 0.57)   | <0.001  |
|          | 50-54     | 0.15             | (0.13 to 0.18)   | <0.001  | 0.76             | (0.68 to 0.84)   | <0.001  |
|          | 55-59     | 0.33             | (0.31 to 0.35)   | <0.001  | 0.84             | (0.76 to 0.92)   | <0.001  |
|          | 60-64     | 0.46             | (0.44 to 0.48)   | <0.001  | 0.96             | (0.88 to 1.03)   | <0.001  |
|          | 65-69     | 0.63             | (0.61 to 0.66)   | <0.001  | 0.99             | (0.92 to 1.06)   | <0.001  |
|          | 70-74     | 0.67             | (0.64 to 0.69)   | <0.001  | 0.89             | (0.82 to 0.96)   | <0.001  |
|          | 75-79     | 1.00             | (0.98 to 1.03)   | <0.001  | 1.05             | (0.98 to 1.12)   | <0.001  |
|          | 80-84     | 1.24             | (1.21 to 1.26)   | <0.001  | 0.89             | (0.80 to 0.97)   | <0.001  |
| 85+      | 1.31      | (1.28 to 1.34)   | <0.001           | 1.24    | (1.15 to 1.34)   | <0.001           |         |
| Period   | 1990-1994 | -0.81            | (-0.83 to -0.79) | <0.001  | -0.47            | (-0.53 to -0.42) | <0.001  |
|          | 1995-1999 | -0.26            | (-0.27 to -0.24) | <0.001  | -0.02            | (-0.06 to 0.02)  | 0.306   |
|          | 2000-2004 | 0.14             | (0.12 to 0.15)   | <0.001  | 0.18             | (0.14 to 0.21)   | <0.001  |
|          | 2005-2009 | 0.38             | (0.37 to 0.39)   | <0.001  | 0.21             | (0.17 to 0.25)   | <0.001  |
|          | 2010-2014 | 0.55             | (0.54 to 0.56)   | <0.001  | 0.11             | (0.07 to 0.15)   | <0.001  |
| Cohort   | 1905      | 0.80             | (0.71 to 0.89)   | <0.001  | 1.62             | (1.44 to 1.80)   | <0.001  |
|          | 1910      | 0.70             | (0.64 to 0.77)   | <0.001  | 1.45             | (1.32 to 1.59)   | <0.001  |
|          | 1915      | 0.63             | (0.58 to 0.67)   | <0.001  | 1.30             | (1.20 to 1.41)   | <0.001  |
|          | 1920      | 0.54             | (0.50 to 0.57)   | <0.001  | 1.01             | (0.92 to 1.09)   | <0.001  |
|          | 1925      | 0.43             | (0.40 to 0.45)   | <0.001  | 0.64             | (0.57 to 0.72)   | <0.001  |
|          | 1930      | 0.33             | (0.31 to 0.36)   | <0.001  | 0.23             | (0.16 to 0.31)   | <0.001  |
|          | 1935      | 0.27             | (0.24 to 0.29)   | <0.001  | -0.07            | (-0.15 to 0.01)  | 0.104   |
|          | 1940      | 0.24             | (0.21 to 0.26)   | <0.001  | -0.24            | (-0.33 to -0.16) | <0.001  |
|          | 1945      | 0.21             | (0.18 to 0.24)   | <0.001  | -0.36            | (-0.45 to -0.27) | <0.001  |
|          | 1950      | 0.16             | (0.13 to 0.18)   | <0.001  | -0.42            | (-0.51 to -0.32) | <0.001  |
|          | 1955      | 0.10             | (0.08 to 0.13)   | <0.001  | -0.47            | (-0.57 to -0.37) | <0.001  |
|          | 1960      | 0.03             | (0.00 to 0.05)   | 0.039   | -0.51            | (-0.61 to -0.41) | <0.001  |
|          | 1965      | -0.09            | (-0.11 to -0.06) | <0.001  | -0.55            | (-0.66 to -0.44) | <0.001  |
|          | 1970      | -0.26            | (-0.29 to -0.24) | <0.001  | -0.59            | (-0.71 to -0.48) | <0.001  |
|          | 1975      | -0.48            | (-0.51 to -0.45) | <0.001  | -0.59            | (-0.72 to -0.47) | <0.001  |
|          | 1980      | -0.67            | (-0.70 to -0.64) | <0.001  | -0.53            | (-0.67 to -0.40) | <0.001  |
|          | 1985      | -0.83            | (-0.87 to -0.79) | <0.001  | -0.53            | (-0.70 to -0.36) | <0.001  |
| 1990     | -0.97     | (-1.02 to -0.92) | <0.001           | -0.64   | (-0.89 to -0.38) | <0.001           |         |
| 1995     | -1.13     | (-1.22 to -1.03) | <0.001           | -0.76   | (-1.29 to -0.23) | 0.005            |         |
| Constant |           | -7.99            | (-8.00 to -7.98) | <0.001  | -9.34            | (-9.38 to -9.30) | <0.001  |
| Deviance |           | 49.51            |                  |         | 118.78           |                  |         |
| AIC      |           | 10.83            |                  |         | 10.26            |                  |         |
| BIC      |           | -118.88          |                  |         | -49.60           |                  |         |

CI, Confidence Interval; AIC, Akaike Information Criterion; BIC, Bayesian Information Criterion
